# Supplementary material for: Reconstruction of large-scale regulatory networks based on perturbation graphs and transitive reduction: improved methods and their evaluation
Source: Springer Nature journal article supplement (doi:10.1186/1752-0509-7-73), 2013-08-08

# Additional File 1

## Supplementary Tables and Figures

**Table T1 - Performance of the inference algorithms on the SysGenSIM networks with connectivity  $K \simeq 2$**

Each score is the mean of the AUPR computed for the 10 networks with connectivity  $K \simeq 2$  simulated according to the same noise configuration. Thresholds used by the inference algorithms are  $\beta = 2.0$  and  $\gamma = 0.05$  for  $\text{PG}^{\text{new}}$ ,  $\alpha = 0.95$  for  $\text{TRANSWESD}^{\cdot, \text{w}, \infty}$ ,  $\alpha = 1.50$  for  $\text{TRANSWESD}^{\cdot, \text{w}, 2}$  and  $\alpha = 0.15$  for  $\text{LTR}^{\cdot, \text{w}}$ .

| Inference algorithm                                                      | Noise configuration |        |        |        |        |        |        |        |        |
|--------------------------------------------------------------------------|---------------------|--------|--------|--------|--------|--------|--------|--------|--------|
|                                                                          | 1 - LL              | 2 - LM | 3 - LH | 4 - ML | 5 - MM | 6 - MH | 7 - HL | 8 - HM | 9 - HH |
| $\text{PG}^{\text{new}}$                                                 | 0.6330              | 0.5841 | 0.4374 | 0.5582 | 0.5473 | 0.4771 | 0.4067 | 0.4154 | 0.3863 |
| $\text{PG}^{\text{new}} + \text{TRANSWESD}^{\text{u}, \text{w}, \infty}$ | 0.6544              | 0.5886 | 0.4361 | 0.5714 | 0.5580 | 0.4809 | 0.4110 | 0.4194 | 0.3890 |
| $\text{PG}^{\text{new}} + \text{TRANSWESD}^{\text{s}, \text{w}, \infty}$ | 0.6556              | 0.5894 | 0.4362 | 0.5719 | 0.5586 | 0.4812 | 0.4110 | 0.4193 | 0.3890 |
| $\text{PG}^{\text{new}} + \text{TRANSWESD}^{\text{u}, \text{w}, 2}$      | 0.5969              | 0.4609 | 0.4055 | 0.5015 | 0.4995 | 0.4366 | 0.3698 | 0.3877 | 0.3629 |
| $\text{PG}^{\text{new}} + \text{TRANSWESD}^{\text{s}, \text{w}, 2}$      | 0.6011              | 0.4717 | 0.4058 | 0.5036 | 0.5013 | 0.4374 | 0.3704 | 0.3883 | 0.3634 |
| $\text{PG}^{\text{new}} + \text{LTR}^{\text{u}, \text{u}}$               | 0.6336              | 0.5210 | 0.4188 | 0.5409 | 0.5318 | 0.4594 | 0.3935 | 0.4067 | 0.3770 |
| $\text{PG}^{\text{new}} + \text{LTR}^{\text{s}, \text{u}}$               | 0.6358              | 0.5270 | 0.4189 | 0.5421 | 0.5328 | 0.4598 | 0.3940 | 0.4071 | 0.3772 |
| $\text{PG}^{\text{new}} + \text{LTR}^{\text{u}, \text{w}}$               | 0.6644              | 0.5978 | 0.4420 | 0.5709 | 0.5579 | 0.4812 | 0.4106 | 0.4203 | 0.3882 |
| $\text{PG}^{\text{new}} + \text{LTR}^{\text{s}, \text{w}}$               | 0.6656              | 0.5988 | 0.4420 | 0.5714 | 0.5584 | 0.4814 | 0.4107 | 0.4204 | 0.3883 |

**Table T2 - Performance of the inference algorithms on the SysGenSIM networks with connectivity  $K \simeq 2.5$**

Each score is the mean of the AUPR computed for the 10 networks with connectivity  $K \simeq 2.5$  simulated according to the same noise configuration. Thresholds used by the inference algorithms are  $\beta = 2.0$  and  $\gamma = 0.05$  for  $\text{PG}^{\text{new}}$ ,  $\alpha = 0.95$  for  $\text{TRANSWESD}^{\cdot, \text{w}, \infty}$ ,  $\alpha = 1.50$  for  $\text{TRANSWESD}^{\cdot, \text{w}, 2}$  and  $\alpha = 0.15$  for  $\text{LTR}^{\cdot, \text{w}}$ .

| Inference algorithm                                                      | Noise configuration |        |        |        |        |        |        |        |        |
|--------------------------------------------------------------------------|---------------------|--------|--------|--------|--------|--------|--------|--------|--------|
|                                                                          | 1 - LL              | 2 - LM | 3 - LH | 4 - ML | 5 - MM | 6 - MH | 7 - HL | 8 - HM | 9 - HH |
| $\text{PG}^{\text{new}}$                                                 | 0.5432              | 0.5020 | 0.3773 | 0.4745 | 0.4656 | 0.4044 | 0.3309 | 0.3401 | 0.3160 |
| $\text{PG}^{\text{new}} + \text{TRANSWESD}^{\text{u}, \text{w}, \infty}$ | 0.5547              | 0.5032 | 0.3751 | 0.4821 | 0.4719 | 0.4063 | 0.3338 | 0.3428 | 0.3178 |
| $\text{PG}^{\text{new}} + \text{TRANSWESD}^{\text{s}, \text{w}, \infty}$ | 0.5559              | 0.5042 | 0.3753 | 0.4829 | 0.4726 | 0.4068 | 0.3340 | 0.3430 | 0.3179 |
| $\text{PG}^{\text{new}} + \text{TRANSWESD}^{\text{u}, \text{w}, 2}$      | 0.4776              | 0.3659 | 0.3268 | 0.3893 | 0.3938 | 0.3430 | 0.2861 | 0.3045 | 0.2868 |
| $\text{PG}^{\text{new}} + \text{TRANSWESD}^{\text{s}, \text{w}, 2}$      | 0.4837              | 0.3767 | 0.3275 | 0.3928 | 0.3968 | 0.3445 | 0.2869 | 0.3053 | 0.2875 |
| $\text{PG}^{\text{new}} + \text{LTR}^{\text{u}, \text{u}}$               | 0.5266              | 0.4305 | 0.3444 | 0.4387 | 0.4341 | 0.3727 | 0.3147 | 0.3285 | 0.3050 |
| $\text{PG}^{\text{new}} + \text{LTR}^{\text{s}, \text{u}}$               | 0.5292              | 0.4361 | 0.3448 | 0.4406 | 0.4358 | 0.3736 | 0.3152 | 0.3291 | 0.3054 |
| $\text{PG}^{\text{new}} + \text{LTR}^{\text{u}, \text{w}}$               | 0.5692              | 0.5074 | 0.3736 | 0.4833 | 0.4711 | 0.4045 | 0.3344 | 0.3444 | 0.3190 |
| $\text{PG}^{\text{new}} + \text{LTR}^{\text{s}, \text{w}}$               | 0.5705              | 0.5083 | 0.3736 | 0.4840 | 0.4717 | 0.4048 | 0.3345 | 0.3444 | 0.3191 |

**Table T3 - Statistics on edges from inferred SysGenSIM networks (configuration 2 - LM)**

The total number of edges and the number of true positives (TPs) and false positives (FPs) for the perturbation graph are shown in the table. The relative reduction of these measures in the graphs obtained after applying the different TR techniques is also displayed. These averaged statistics are computed from the analysis of the graphs obtained after inferring the 30 SysGenSIM networks simulated according to configuration 2 (LM). Thresholds used were  $\beta = 2.0$  and  $\gamma = 0.05$  for  $PG^{new}$ ,  $\alpha = 0.95$  for  $TRANSWESD^{u,w,\infty}$ ,  $\alpha = 1.50$  for  $TRANSWESD^{u,w,2}$  and  $\alpha = 0.15$  for  $LTR^{u,w}$ .

| Inference algorithm                 | $K \simeq 1.5$ |         |         | $K \simeq 2$ |         |         | $K \simeq 2.5$ |         |         |
|-------------------------------------|----------------|---------|---------|--------------|---------|---------|----------------|---------|---------|
|                                     | Edges          | TPs     | FPs     | Edges        | TPs     | FPs     | Edges          | TPs     | FPs     |
| $PG^{new}$                          | 109078         | 6106    | 102972  | 110614       | 7248    | 103366  | 105254         | 8028    | 97226   |
| $PG^{new} + TRANSWESD^{u,w,\infty}$ | -1.30%         | -1.17%  | -1.31%  | -2.18%       | -1.63%  | -2.22%  | -4.00%         | -2.77%  | -4.10%  |
| $PG^{new} + TRANSWESD^{s,w,\infty}$ | -1.25%         | -1.08%  | -1.26%  | -2.06%       | -1.39%  | -2.11%  | -3.85%         | -2.41%  | -3.96%  |
| $PG^{new} + TRANSWESD^{u,w,2}$      | -20.45%        | -24.29% | -20.22% | -24.17%      | -32.08% | -23.61% | -26.04%        | -38.30% | -25.03% |
| $PG^{new} + TRANSWESD^{s,w,2}$      | -20.21%        | -22.86% | -20.05% | -23.81%      | -30.31% | -23.36% | -25.58%        | -36.20% | -24.70% |
| $PG^{new} + LTR^{u,u}$              | -17.09%        | -16.22% | -17.14% | -19.79%      | -21.14% | -19.70% | -21.19%        | -25.14% | -20.87% |
| $PG^{new} + LTR^{s,u}$              | -16.92%        | -15.28% | -17.02% | -19.57%      | -20.13% | -19.53% | -20.91%        | -24.04% | -20.65% |
| $PG^{new} + LTR^{u,w}$              | -3.90%         | -5.85%  | -3.79%  | -5.10%       | -8.13%  | -4.88%  | -6.11%         | -9.52%  | -5.82%  |
| $PG^{new} + LTR^{s,w}$              | -3.82%         | -5.74%  | -3.71%  | -5.01%       | -7.89%  | -4.81%  | -6.02%         | -9.25%  | -5.75%  |

**Table T4 - Statistics on edges from inferred SysGenSIM networks (configuration 3 - LH)**

The total number of edges and the number of true positives (TPs) and false positives (FPs) for the perturbation graph are shown in the table. The relative reduction of these measures in the graphs obtained after applying the different TR techniques is also displayed. These averaged statistics are computed from the analysis of the graphs obtained after inferring the 30 SysGenSIM networks simulated according to configuration 3 (LH). Thresholds used were  $\beta = 2.0$  and  $\gamma = 0.05$  for  $PG^{new}$ ,  $\alpha = 0.95$  for  $TRANSWESD^{u,w,\infty}$ ,  $\alpha = 1.50$  for  $TRANSWESD^{u,w,2}$  and  $\alpha = 0.15$  for  $LTR^{u,w}$ .

| Inference algorithm                 | $K \simeq 1.5$ |         |         | $K \simeq 2$ |         |         | $K \simeq 2.5$ |         |         |
|-------------------------------------|----------------|---------|---------|--------------|---------|---------|----------------|---------|---------|
|                                     | Edges          | TPs     | FPs     | Edges        | TPs     | FPs     | Edges          | TPs     | FPs     |
| $PG^{new}$                          | 13262          | 4569    | 8694    | 15677        | 5320    | 10357   | 19162          | 5875    | 13287   |
| $PG^{new} + TRANSWESD^{u,w,\infty}$ | -2.05%         | -1.36%  | -2.41%  | -2.28%       | -1.33%  | -2.77%  | -2.54%         | -1.71%  | -2.90%  |
| $PG^{new} + TRANSWESD^{s,w,\infty}$ | -2.03%         | -1.34%  | -2.40%  | -2.25%       | -1.30%  | -2.74%  | -2.44%         | -1.61%  | -2.80%  |
| $PG^{new} + TRANSWESD^{u,w,2}$      | -12.49%        | -12.14% | -12.68% | -17.88%      | -18.35% | -17.65% | -22.70%        | -24.72% | -21.81% |
| $PG^{new} + TRANSWESD^{s,w,2}$      | -12.47%        | -12.10% | -12.66% | -17.83%      | -18.26% | -17.60% | -22.58%        | -24.49% | -21.73% |
| $PG^{new} + LTR^{u,u}$              | -10.55%        | -9.33%  | -11.19% | -14.68%      | -13.70% | -15.18% | -18.33%        | -18.46% | -18.27% |
| $PG^{new} + LTR^{s,u}$              | -10.53%        | -9.30%  | -11.18% | -14.64%      | -13.65% | -15.14% | -18.25%        | -18.31% | -18.22% |
| $PG^{new} + LTR^{u,w}$              | -8.15%         | -5.03%  | -9.79%  | -10.06%      | -6.50%  | -11.89% | -10.52%        | -8.04%  | -11.61% |
| $PG^{new} + LTR^{s,w}$              | -8.14%         | -5.02%  | -9.78%  | -10.05%      | -6.48%  | -11.88% | -10.49%        | -8.01%  | -11.59% |

**Table T5 - Statistics on edges from inferred SysGenSIM networks (configuration 4 - ML)**

The total number of edges and the number of true positives (TPs) and false positives (FPs) for the perturbation graph are shown in the table. The relative reduction of these measures in the graphs obtained after applying the different TR techniques is also displayed. These averaged statistics are computed from the analysis of the graphs obtained after inferring the 30 SysGenSIM networks simulated according to configuration 4 (ML). Thresholds used were  $\beta = 2.0$  and  $\gamma = 0.05$  for  $\text{PG}^{\text{new}}$ ,  $\alpha = 0.95$  for  $\text{TRANSWESD}^{\cdot,w,\infty}$ ,  $\alpha = 1.50$  for  $\text{TRANSWESD}^{\cdot,w,2}$  and  $\alpha = 0.15$  for  $\text{LTR}^{\cdot,w}$ .

| Inference algorithm                                             | $K \simeq 1.5$ |         |         | $K \simeq 2$ |         |         | $K \simeq 2.5$ |         |         |
|-----------------------------------------------------------------|----------------|---------|---------|--------------|---------|---------|----------------|---------|---------|
|                                                                 | Edges          | TPs     | FPs     | Edges        | TPs     | FPs     | Edges          | TPs     | FPs     |
| $\text{PG}^{\text{new}}$                                        | 13625          | 5517    | 8108    | 20149        | 6337    | 13813   | 28873          | 6960    | 21913   |
| $\text{PG}^{\text{new}} + \text{TRANSWESD}^{\text{u},w,\infty}$ | -8.98%         | -0.31%  | -14.88% | -8.86%       | -1.03%  | -12.45% | -11.50%        | -2.13%  | -14.47% |
| $\text{PG}^{\text{new}} + \text{TRANSWESD}^{\text{s},w,\infty}$ | -8.77%         | -0.23%  | -14.59% | -8.55%       | -0.86%  | -12.09% | -11.12%        | -1.79%  | -14.08% |
| $\text{PG}^{\text{new}} + \text{TRANSWESD}^{\text{u},w,2}$      | -30.15%        | -15.69% | -39.99% | -34.26%      | -24.57% | -38.71% | -36.97%        | -32.59% | -38.35% |
| $\text{PG}^{\text{new}} + \text{TRANSWESD}^{\text{s},w,2}$      | -30.02%        | -15.53% | -39.88% | -33.99%      | -24.08% | -38.54% | -36.49%        | -31.64% | -38.03% |
| $\text{PG}^{\text{new}} + \text{LTR}^{\text{u},\text{u}}$       | -24.23%        | -9.32%  | -34.38% | -26.60%      | -13.97% | -32.40% | -28.55%        | -19.11% | -31.54% |
| $\text{PG}^{\text{new}} + \text{LTR}^{\text{s},\text{u}}$       | -24.15%        | -9.23%  | -34.31% | -26.42%      | -13.67% | -32.27% | -28.25%        | -18.55% | -31.34% |
| $\text{PG}^{\text{new}} + \text{LTR}^{\text{u},\text{w}}$       | -21.28%        | -4.94%  | -32.40% | -21.01%      | -6.30%  | -27.76% | -19.79%        | -7.35%  | -23.74% |
| $\text{PG}^{\text{new}} + \text{LTR}^{\text{s},\text{w}}$       | -21.24%        | -4.90%  | -32.36% | -20.93%      | -6.19%  | -27.70% | -19.67%        | -7.11%  | -23.66% |

**Table T6 - Statistics on edges from inferred SysGenSIM networks (configuration 5 - MM)**

The total number of edges and the number of true positives (TPs) and false positives (FPs) for the perturbation graph are shown in the table. The relative reduction of these measures in the graphs obtained after applying the different TR techniques is also displayed. These averaged statistics are computed from the analysis of the graphs obtained after inferring the 30 SysGenSIM networks simulated according to configuration 5 (MM). Thresholds used were  $\beta = 2.0$  and  $\gamma = 0.05$  for  $\text{PG}^{\text{new}}$ ,  $\alpha = 0.95$  for  $\text{TRANSWESD}^{\cdot,w,\infty}$ ,  $\alpha = 1.50$  for  $\text{TRANSWESD}^{\cdot,w,2}$  and  $\alpha = 0.15$  for  $\text{LTR}^{\cdot,w}$ .

| Inference algorithm                                             | $K \simeq 1.5$ |         |         | $K \simeq 2$ |         |         | $K \simeq 2.5$ |         |         |
|-----------------------------------------------------------------|----------------|---------|---------|--------------|---------|---------|----------------|---------|---------|
|                                                                 | Edges          | TPs     | FPs     | Edges        | TPs     | FPs     | Edges          | TPs     | FPs     |
| $\text{PG}^{\text{new}}$                                        | 11599          | 5373    | 6226    | 16898        | 6152    | 10746   | 23738          | 6742    | 16996   |
| $\text{PG}^{\text{new}} + \text{TRANSWESD}^{\text{u},w,\infty}$ | -8.31%         | -0.34%  | -15.19% | -8.15%       | -1.09%  | -12.19% | -9.92%         | -1.97%  | -13.08% |
| $\text{PG}^{\text{new}} + \text{TRANSWESD}^{\text{s},w,\infty}$ | -8.18%         | -0.29%  | -15.00% | -7.82%       | -0.89%  | -11.78% | -9.58%         | -1.68%  | -12.71% |
| $\text{PG}^{\text{new}} + \text{TRANSWESD}^{\text{u},w,2}$      | -29.44%        | -14.49% | -42.34% | -34.18%      | -22.78% | -40.71% | -37.14%        | -29.93% | -40.00% |
| $\text{PG}^{\text{new}} + \text{TRANSWESD}^{\text{s},w,2}$      | -29.33%        | -14.35% | -42.27% | -33.93%      | -22.32% | -40.58% | -36.70%        | -29.09% | -39.71% |
| $\text{PG}^{\text{new}} + \text{LTR}^{\text{u},\text{u}}$       | -23.94%        | -9.21%  | -36.65% | -26.68%      | -13.44% | -34.26% | -28.79%        | -18.05% | -33.06% |
| $\text{PG}^{\text{new}} + \text{LTR}^{\text{s},\text{u}}$       | -23.88%        | -9.14%  | -36.60% | -26.53%      | -13.18% | -34.17% | -28.50%        | -17.53% | -32.86% |
| $\text{PG}^{\text{new}} + \text{LTR}^{\text{u},\text{w}}$       | -21.10%        | -5.20%  | -34.83% | -21.11%      | -6.36%  | -29.55% | -20.16%        | -7.61%  | -25.13% |
| $\text{PG}^{\text{new}} + \text{LTR}^{\text{s},\text{w}}$       | -21.07%        | -5.16%  | -34.79% | -21.04%      | -6.25%  | -29.50% | -20.05%        | -7.41%  | -25.06% |

**Table T7 - Statistics on edges from inferred SysGenSIM networks (configuration 6 - MH)**

The total number of edges and the number of true positives (TPs) and false positives (FPs) for the perturbation graph are shown in the table. The relative reduction of these measures in the graphs obtained after applying the different TR techniques is also displayed. These averaged statistics are computed from the analysis of the graphs obtained after inferring the 30 SysGenSIM networks simulated according to configuration 6 (MH). Thresholds used were  $\beta = 2.0$  and  $\gamma = 0.05$  for  $\text{PG}^{\text{new}}$ ,  $\alpha = 0.95$  for  $\text{TRANSWESD}^{\cdot,w,\infty}$ ,  $\alpha = 1.50$  for  $\text{TRANSWESD}^{\cdot,w,2}$  and  $\alpha = 0.15$  for  $\text{LTR}^{\cdot,w}$ .

| Inference algorithm                                             | $K \simeq 1.5$ |         |         | $K \simeq 2$ |         |         | $K \simeq 2.5$ |         |         |
|-----------------------------------------------------------------|----------------|---------|---------|--------------|---------|---------|----------------|---------|---------|
|                                                                 | Edges          | TPs     | FPs     | Edges        | TPs     | FPs     | Edges          | TPs     | FPs     |
| $\text{PG}^{\text{new}}$                                        | 9707           | 4739    | 4968    | 14179        | 5389    | 8790    | 20115          | 5948    | 14166   |
| $\text{PG}^{\text{new}} + \text{TRANSWESD}^{\text{u},w,\infty}$ | -5.16%         | -0.50%  | -9.61%  | -4.71%       | -0.87%  | -7.06%  | -6.35%         | -1.63%  | -8.33%  |
| $\text{PG}^{\text{new}} + \text{TRANSWESD}^{\text{s},w,\infty}$ | -5.10%         | -0.47%  | -9.51%  | -4.51%       | -0.74%  | -6.83%  | -6.09%         | -1.40%  | -8.06%  |
| $\text{PG}^{\text{new}} + \text{TRANSWESD}^{\text{u},w,2}$      | -22.26%        | -12.72% | -31.36% | -26.19%      | -19.59% | -30.24% | -28.41%        | -26.44% | -29.23% |
| $\text{PG}^{\text{new}} + \text{TRANSWESD}^{\text{s},w,2}$      | -22.19%        | -12.64% | -31.30% | -26.06%      | -19.37% | -30.17% | -28.13%        | -25.96% | -29.04% |
| $\text{PG}^{\text{new}} + \text{LTR}^{\text{u},\text{u}}$       | -18.26%        | -8.52%  | -27.54% | -20.57%      | -12.46% | -25.54% | -22.17%        | -17.03% | -24.33% |
| $\text{PG}^{\text{new}} + \text{LTR}^{\text{s},\text{u}}$       | -18.22%        | -8.49%  | -27.51% | -20.48%      | -12.32% | -25.48% | -21.98%        | -16.72% | -24.19% |
| $\text{PG}^{\text{new}} + \text{LTR}^{\text{u},\text{w}}$       | -15.70%        | -4.97%  | -25.94% | -15.29%      | -5.96%  | -21.00% | -14.16%        | -6.93%  | -17.19% |
| $\text{PG}^{\text{new}} + \text{LTR}^{\text{s},\text{w}}$       | -15.68%        | -4.95%  | -25.92% | -15.25%      | -5.91%  | -20.98% | -14.10%        | -6.84%  | -17.15% |

**Table T8 - Statistics on edges from inferred SysGenSIM networks (configuration 7 - HL)**

The total number of edges and the number of true positives (TPs) and false positives (FPs) for the perturbation graph are shown in the table. The relative reduction of these measures in the graphs obtained after applying the different TR techniques is also displayed. These averaged statistics are computed from the analysis of the graphs obtained after inferring the 30 SysGenSIM networks simulated according to configuration 7 (HL). Thresholds used were  $\beta = 2.0$  and  $\gamma = 0.05$  for  $\text{PG}^{\text{new}}$ ,  $\alpha = 0.95$  for  $\text{TRANSWESD}^{\cdot,w,\infty}$ ,  $\alpha = 1.50$  for  $\text{TRANSWESD}^{\cdot,w,2}$  and  $\alpha = 0.15$  for  $\text{LTR}^{\cdot,w}$ .

| Inference algorithm                                             | $K \simeq 1.5$ |        |         | $K \simeq 2$ |         |         | $K \simeq 2.5$ |         |         |
|-----------------------------------------------------------------|----------------|--------|---------|--------------|---------|---------|----------------|---------|---------|
|                                                                 | Edges          | TPs    | FPs     | Edges        | TPs     | FPs     | Edges          | TPs     | FPs     |
| $\text{PG}^{\text{new}}$                                        | 11183          | 3618   | 7566    | 19022        | 4067    | 14956   | 27518          | 4353    | 23165   |
| $\text{PG}^{\text{new}} + \text{TRANSWESD}^{\text{u},w,\infty}$ | -3.07%         | -0.12% | -4.49%  | -4.00%       | -0.33%  | -4.99%  | -4.84%         | -0.71%  | -5.62%  |
| $\text{PG}^{\text{new}} + \text{TRANSWESD}^{\text{s},w,\infty}$ | -3.00%         | -0.11% | -4.39%  | -3.84%       | -0.30%  | -4.80%  | -4.66%         | -0.59%  | -5.42%  |
| $\text{PG}^{\text{new}} + \text{TRANSWESD}^{\text{u},w,2}$      | -14.96%        | -9.64% | -17.50% | -18.67%      | -17.18% | -19.07% | -19.05%        | -21.96% | -18.50% |
| $\text{PG}^{\text{new}} + \text{TRANSWESD}^{\text{s},w,2}$      | -14.84%        | -9.59% | -17.36% | -18.41%      | -16.92% | -18.81% | -18.65%        | -21.56% | -18.11% |
| $\text{PG}^{\text{new}} + \text{LTR}^{\text{u},\text{u}}$       | -11.64%        | -5.26% | -14.69% | -14.19%      | -8.85%  | -15.65% | -14.44%        | -11.07% | -15.08% |
| $\text{PG}^{\text{new}} + \text{LTR}^{\text{s},\text{u}}$       | -11.53%        | -5.21% | -14.56% | -13.98%      | -8.64%  | -15.44% | -14.14%        | -10.78% | -14.77% |
| $\text{PG}^{\text{new}} + \text{LTR}^{\text{u},\text{w}}$       | -9.62%         | -2.05% | -13.25% | -9.92%       | -2.83%  | -11.85% | -9.12%         | -3.10%  | -10.25% |
| $\text{PG}^{\text{new}} + \text{LTR}^{\text{s},\text{w}}$       | -9.59%         | -2.03% | -13.21% | -9.86%       | -2.79%  | -11.78% | -9.05%         | -3.05%  | -10.18% |

**Table T9 - Statistics on edges from inferred SysGenSIM networks (configuration 8 - HM)**

The total number of edges and the number of true positives (TPs) and false positives (FPs) for the perturbation graph are shown in the table. The relative reduction of these measures in the graphs obtained after applying the different TR techniques is also displayed. These averaged statistics are computed from the analysis of the graphs obtained after inferring the 30 SysGenSIM networks simulated according to configuration 8 (HM). Thresholds used were  $\beta = 2.0$  and  $\gamma = 0.05$  for  $\text{PG}^{\text{new}}$ ,  $\alpha = 0.95$  for  $\text{TRANSWESD}^{\cdot,w,\infty}$ ,  $\alpha = 1.50$  for  $\text{TRANSWESD}^{\cdot,w,2}$  and  $\alpha = 0.15$  for  $\text{LTR}^{\cdot,w}$ .

| Inference algorithm                                             | $K \simeq 1.5$ |        |         | $K \simeq 2$ |         |         | $K \simeq 2.5$ |         |         |
|-----------------------------------------------------------------|----------------|--------|---------|--------------|---------|---------|----------------|---------|---------|
|                                                                 | Edges          | TPs    | FPs     | Edges        | TPs     | FPs     | Edges          | TPs     | FPs     |
| $\text{PG}^{\text{new}}$                                        | 8247           | 3526   | 4721    | 13383        | 3966    | 9417    | 19019          | 4264    | 14755   |
| $\text{PG}^{\text{new}} + \text{TRANSWESD}^{\text{u},w,\infty}$ | -3.60%         | -0.11% | -6.21%  | -3.72%       | -0.35%  | -5.14%  | -4.48%         | -0.61%  | -5.60%  |
| $\text{PG}^{\text{new}} + \text{TRANSWESD}^{\text{s},w,\infty}$ | -3.55%         | -0.10% | -6.13%  | -3.53%       | -0.32%  | -4.88%  | -4.23%         | -0.47%  | -5.31%  |
| $\text{PG}^{\text{new}} + \text{TRANSWESD}^{\text{u},w,2}$      | -17.68%        | -8.56% | -24.49% | -22.21%      | -15.55% | -25.01% | -22.93%        | -20.02% | -23.77% |
| $\text{PG}^{\text{new}} + \text{TRANSWESD}^{\text{s},w,2}$      | -17.64%        | -8.52% | -24.46% | -22.05%      | -15.32% | -24.88% | -22.68%        | -19.65% | -23.56% |
| $\text{PG}^{\text{new}} + \text{LTR}^{\text{u},\text{u}}$       | -13.70%        | -4.78% | -20.36% | -16.73%      | -8.07%  | -20.38% | -17.08%        | -10.03% | -19.12% |
| $\text{PG}^{\text{new}} + \text{LTR}^{\text{s},\text{u}}$       | -13.67%        | -4.74% | -20.34% | -16.62%      | -7.93%  | -20.28% | -16.90%        | -9.78%  | -18.96% |
| $\text{PG}^{\text{new}} + \text{LTR}^{\text{u},\text{w}}$       | -11.55%        | -1.96% | -18.72% | -11.85%      | -2.76%  | -15.68% | -11.22%        | -3.09%  | -13.57% |
| $\text{PG}^{\text{new}} + \text{LTR}^{\text{s},\text{w}}$       | -11.54%        | -1.95% | -18.71% | -11.82%      | -2.72%  | -15.65% | -11.18%        | -3.04%  | -13.53% |

**Table T10 - Statistics on edges from inferred SysGenSIM networks (configuration 9 - HH)**

The total number of edges and the number of true positives (TPs) and false positives (FPs) for the perturbation graph are shown in the table. The relative reduction of these measures in the graphs obtained after applying the different TR techniques is also displayed. These averaged statistics are computed from the analysis of the graphs obtained after inferring the 30 SysGenSIM networks simulated according to configuration 9 (HH). Thresholds used were  $\beta = 2.0$  and  $\gamma = 0.05$  for  $\text{PG}^{\text{new}}$ ,  $\alpha = 0.95$  for  $\text{TRANSWESD}^{\cdot,w,\infty}$ ,  $\alpha = 1.50$  for  $\text{TRANSWESD}^{\cdot,w,2}$  and  $\alpha = 0.15$  for  $\text{LTR}^{\cdot,w}$ .

| Inference algorithm                                             | $K \simeq 1.5$ |        |         | $K \simeq 2$ |         |         | $K \simeq 2.5$ |         |         |
|-----------------------------------------------------------------|----------------|--------|---------|--------------|---------|---------|----------------|---------|---------|
|                                                                 | Edges          | TPs    | FPs     | Edges        | TPs     | FPs     | Edges          | TPs     | FPs     |
| $\text{PG}^{\text{new}}$                                        | 7396           | 3181   | 4215    | 12084        | 3625    | 8459    | 17230          | 3932    | 13298   |
| $\text{PG}^{\text{new}} + \text{TRANSWESD}^{\text{u},w,\infty}$ | -2.70%         | -0.09% | -4.67%  | -3.36%       | -0.29%  | -4.67%  | -3.48%         | -0.54%  | -4.35%  |
| $\text{PG}^{\text{new}} + \text{TRANSWESD}^{\text{s},w,\infty}$ | -2.64%         | -0.08% | -4.58%  | -3.20%       | -0.28%  | -4.46%  | -3.26%         | -0.47%  | -4.08%  |
| $\text{PG}^{\text{new}} + \text{TRANSWESD}^{\text{u},w,2}$      | -13.78%        | -7.44% | -18.56% | -18.19%      | -13.64% | -20.14% | -18.68%        | -17.38% | -19.07% |
| $\text{PG}^{\text{new}} + \text{TRANSWESD}^{\text{s},w,2}$      | -13.74%        | -7.39% | -18.54% | -18.05%      | -13.45% | -20.03% | -18.43%        | -17.02% | -18.85% |
| $\text{PG}^{\text{new}} + \text{LTR}^{\text{u},\text{u}}$       | -10.91%        | -4.29% | -15.91% | -14.01%      | -7.72%  | -16.71% | -14.08%        | -9.26%  | -15.51% |
| $\text{PG}^{\text{new}} + \text{LTR}^{\text{s},\text{u}}$       | -10.88%        | -4.23% | -15.89% | -13.93%      | -7.62%  | -16.63% | -13.90%        | -9.03%  | -15.33% |
| $\text{PG}^{\text{new}} + \text{LTR}^{\text{u},\text{w}}$       | -9.01%         | -1.89% | -14.38% | -9.72%       | -3.01%  | -12.59% | -8.85%         | -2.73%  | -10.66% |
| $\text{PG}^{\text{new}} + \text{LTR}^{\text{s},\text{w}}$       | -9.00%         | -1.89% | -14.37% | -9.68%       | -2.97%  | -12.56% | -8.82%         | -2.70%  | -10.62% |

**Figure F1 - Performance and robustness of the perturbation graph methodology  $PG^{new}$  applied to the 9 noise configurations of network 11 in the SysGenSIM dataset**

The AUPR scores of  $PG^{new}$  are fairly robust for a large range of meaningful parameter values  $\beta$  and  $\gamma$ . The picture shows the performance of the inference of Network 11 (containing about 10000 edges, i.e.  $K \simeq 2$ ) with respect to the 9 different noise conditions.

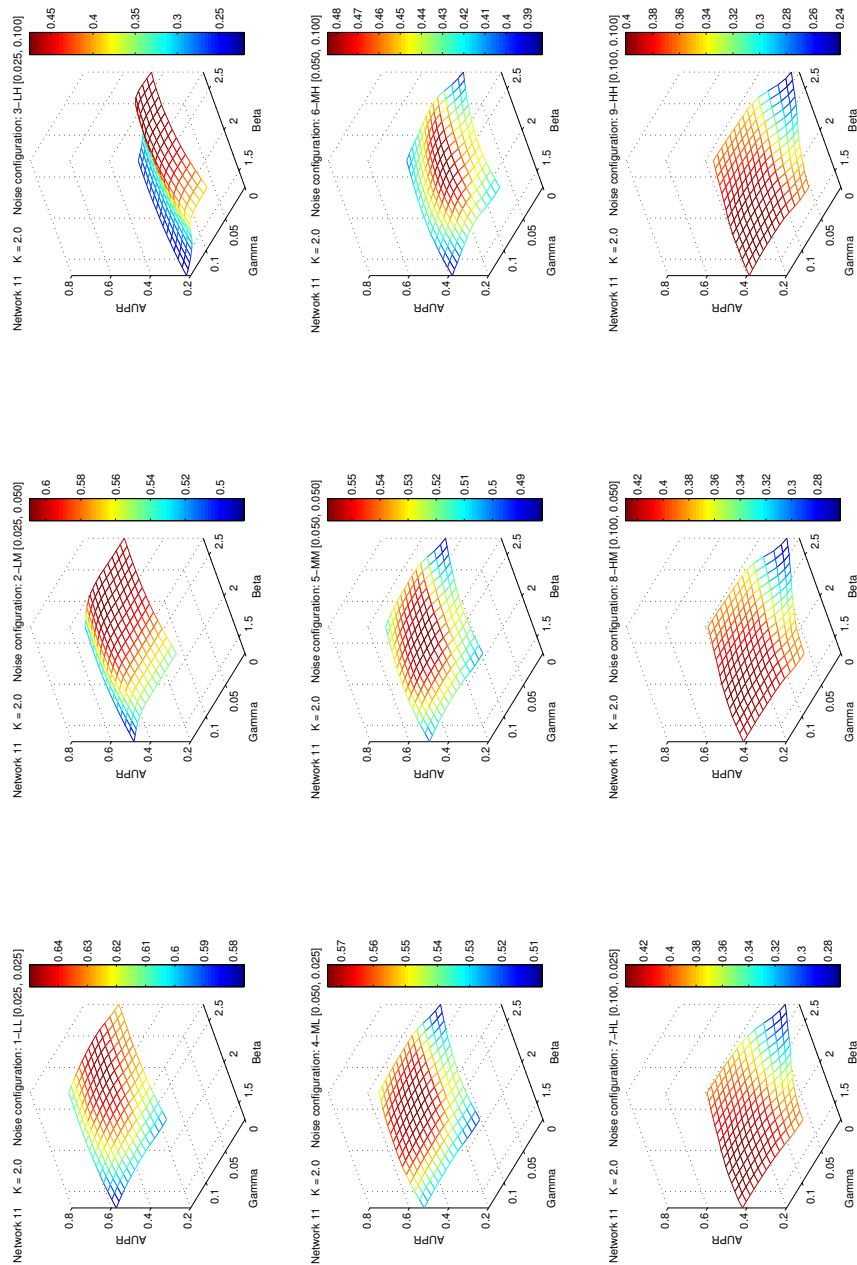

**Figure F2 - Performance and robustness of the perturbation graph methodology  $PG^{new}$  applied to the 9 noise configurations of network 21 in the SysGenSIM dataset**

The AUPR scores of  $PG^{new}$  are fairly robust for a large range of meaningful parameter values  $\beta$  and  $\gamma$ . The picture shows the performance of the inference of Network 21 (containing about 12500 edges, i.e.  $K \simeq 2.5$ ) with respect to the 9 different noise conditions.

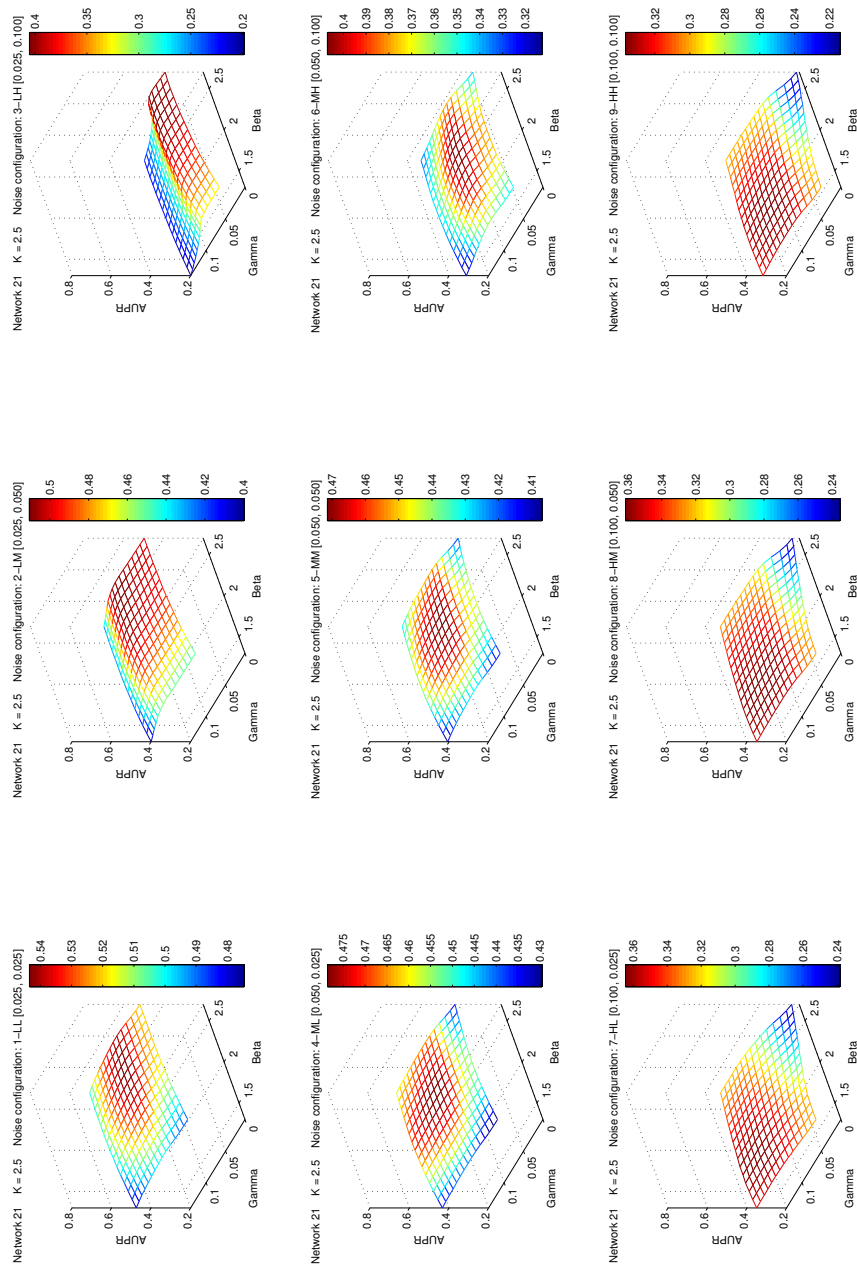

**Figure F3 - Performance of the new TRANSWESD and LTR variants on the SysGenSIM dataset**

Parameters used to obtain the perturbation graph were  $\beta = 2.0$  and  $\gamma = 0.05$ , while  $\alpha = 0.95$  and  $\alpha = 0.15$  were selected for the TRANSWESD and LTR variants, respectively. **AUPR scores are averaged across the 10 networks generated with the same  $K$  and simulated with the same noise configuration.** The efficacy of transitive reduction changes with the connectivity of the network and with the noise levels.

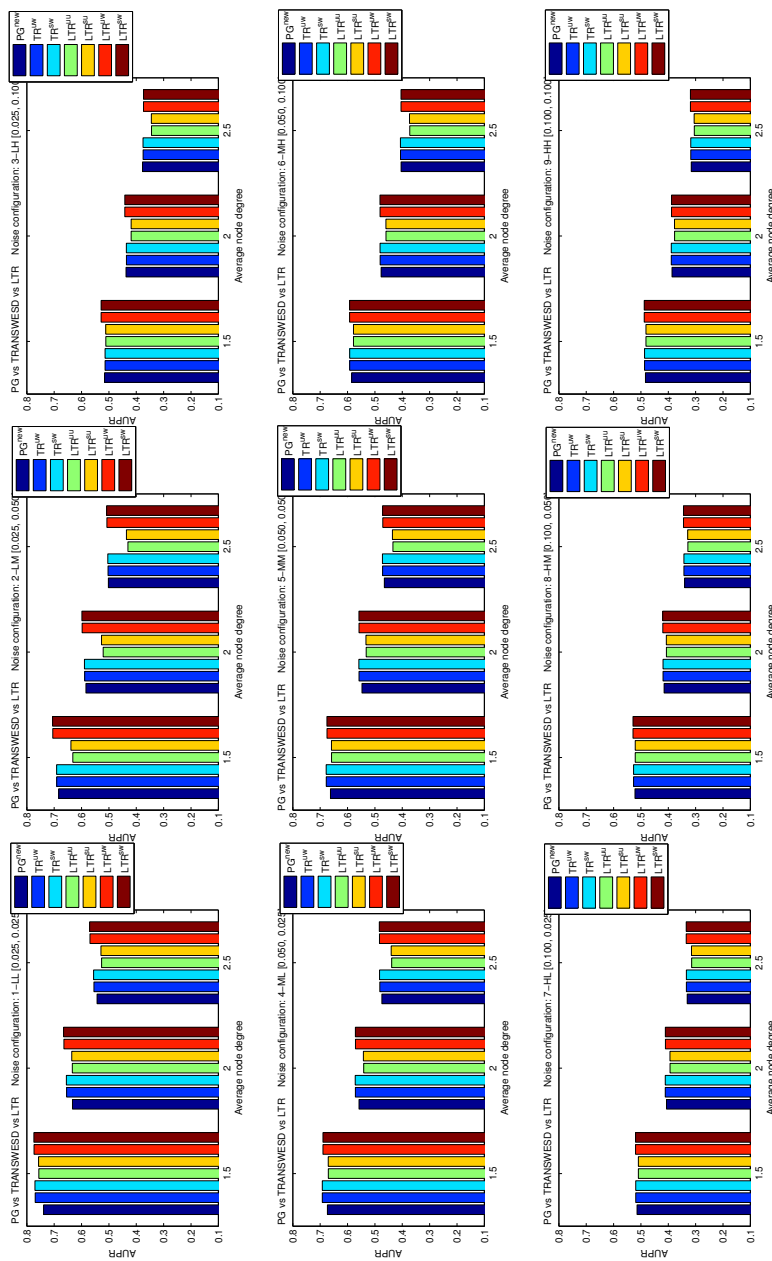

Supplement: 12918_2013_1441_MOESM1_ESM.pdf [file 12918_2013_1441_MOESM1_ESM.pdf]
