# Supplementary material for: Reconstruction of large-scale regulatory networks based on perturbation graphs and transitive reduction: improved methods and their evaluation
Source: PubMed Central journal article supplement (PMC4231426; doi:10.1186/1752-0509-7-73), 2013-08-08
Supplement: 1752-0509-7-73-S2.pdf [file 1752-0509-7-73-S2.pdf]

# Additional File 2

## Table T4 - List of predicted gene interactions in *S. cerevisiae* obtained from a transcription factor knockout dataset

The table shows a sorted list of the 300 most confident edges obtained by applying PG<sup>new</sup> and LTR<sup>u,u</sup> to the dataset published by Reimand et al. in <http://www.ebi.ac.uk/arrayexpress/experiments/E-MTAB-109>. Each predicted edge is compared against the four silver standards **SS**<sub>1</sub>-**SS**<sub>4</sub> (see main text).

The values in the silver standard columns are:

- 1**: if the predicted edge is contained in the silver standard;
- 0**: if the predicted edge is not contained in the silver standard;
- x**: if the predicted edge contains a node not contained in the silver standard.

| Ranking | Transcription factor | Target gene | SS <sub>1</sub> | SS <sub>2</sub> | SS <sub>3</sub> | SS <sub>4</sub> |
|---------|----------------------|-------------|-----------------|-----------------|-----------------|-----------------|
| 1       | YML051W              | YBR018C     | 1               | 1               | x               | 0               |
| 2       | YML051W              | YBR020W     | 1               | 0               | x               | 1               |
| 3       | YML051W              | YBR019C     | 1               | 0               | x               | 1               |
| 4       | YLR176C              | YML058W.A   | 0               | 0               | 1               | 0               |
| 5       | YHR006W              | YHR049C.A   | 0               | 0               | x               | x               |
| 6       | YLR176C              | YMR279C     | 1               | 1               | 1               | 0               |
| 7       | YLR176C              | YIL066C     | 1               | 1               | 1               | 1               |
| 8       | YBR150C              | YIR027C     | x               | x               | x               | x               |
| 9       | YML051W              | YLR081W     | 1               | 1               | x               | 0               |
| 10      | YIL038C              | YDR198C     | x               | x               | x               | x               |
| 11      | YMR070W              | YJR150C     | 0               | 0               | 0               | 0               |
| 12      | YBR033W              | YNR050C     | 0               | 0               | x               | x               |
| 13      | YHL020C              | YJL153C     | 0               | 0               | x               | 0               |
| 14      | YOR191W              | YDL179W     | x               | x               | x               | x               |
| 15      | YLR278C              | YKL134C     | x               | x               | x               | x               |
| 16      | YPR065W              | YDR044W     | 1               | 0               | 1               | 0               |
| 17      | YHL027W              | YLL053C     | 0               | 0               | 0               | 0               |
| 18      | YDR310C              | YNL318C     | 1               | 1               | 1               | 1               |
| 19      | YHL027W              | YPL277C     | 0               | 0               | 0               | 0               |
| 20      | YOR038C              | YPR089W     | 0               | 0               | x               | x               |
| 21      | YBL103C              | YCR097W     | 1               | 0               | 1               | 0               |
| 22      | YHL027W              | YPL278C     | 0               | 0               | 0               | 0               |
| 23      | YGL073W              | YPL111W     | 0               | 0               | 0               | 0               |
| 24      | YOR162C              | YCL002C     | 0               | 0               | x               | 0               |
| 25      | YDR310C              | YCL048W     | 1               | 1               | 1               | 1               |
| 26      | YPL254W              | YGL091C     | x               | x               | x               | x               |
| 27      | YDR310C              | YNL319W     | 0               | 0               | x               | x               |
| 28      | YHL027W              | YOR389W     | 0               | 0               | 0               | 0               |
| 29      | YLR176C              | YGR180C     | 1               | 0               | 1               | 1               |
| 30      | YDR207C              | YOL131W     | 1               | 1               | x               | 1               |
| 31      | YOL067C              | YGR077C     | 0               | 0               | 0               | x               |
| 32      | YOL067C              | YFR021W     | 0               | 0               | x               | x               |
| 33      | YDR310C              | YFR032C     | 1               | 1               | 1               | 1               |
| 34      | YJR094C              | YPR164W     | 0               | 0               | 0               | 0               |
| 35      | YOR140W              | YKR102W     | x               | x               | 0               | x               |
| 36      | YGL237C              | YEL013W     | 0               | 0               | 0               | 0               |
| 37      | YDR310C              | YAL018C     | 1               | 1               | 0               | 0               |
| 38      | YFL052W              | YAR030C     | 0               | 0               | x               | x               |
| 39      | YKL112W              | YBR238C     | 0               | 0               | 0               | 0               |
| 40      | YLR176C              | YJL026W     | 0               | 0               | 1               | 0               |
| 41      | YCR084C              | YMR325W     | x               | x               | x               | x               |
| 42      | YBR033W              | YNL032W     | 0               | 0               | x               | x               |
| 43      | YDL020C              | YGR252W     | 0               | 0               | 0               | 0               |
| 44      | YDL020C              | YDR172W     | 0               | 0               | x               | 0               |
| 45      | YDR207C              | YAL054C     | 1               | 0               | 1               | 1               |
| 46      | YGR056W              | YLL054C     | x               | x               | x               | x               |
| 47      | YCR084C              | YAL068C     | x               | x               | x               | x               |
| 48      | YCR084C              | YHL046C     | x               | x               | x               | x               |
| 49      | YCR084C              | YGR294W     | x               | x               | x               | x               |
| 50      | YCR084C              | YDR542W     | x               | x               | x               | x               |
| 51      | YBR033W              | YBR291C     | 0               | 0               | x               | x               |
| 52      | YOR162C              | YBL037W     | 0               | 0               | x               | 0               |
| 53      | YCR084C              | YLR461W     | x               | x               | x               | x               |
| 54      | YCR084C              | YCR104W     | x               | x               | x               | x               |
| 55      | YCR084C              | YNR076W     | x               | x               | x               | x               |
| 56      | YDR310C              | YGL138C     | 1               | 1               | 1               | 1               |
| 57      | YCR084C              | YIL176C     | x               | x               | x               | x               |
| 58      | YCR084C              | YFL020C     | x               | x               | x               | x               |
| 59      | YJL168C              | YNR062C     | x               | x               | x               | x               |
| 60      | YCR084C              | YAR020C     | x               | x               | x               | x               |

| Ranking | Transcription factor | Target gene | SS <sub>1</sub> | SS <sub>2</sub> | SS <sub>3</sub> | SS <sub>4</sub> |
|---------|----------------------|-------------|-----------------|-----------------|-----------------|-----------------|
| 61      | YCR084C              | YOL161C     | x               | x               | x               | x               |
| 62      | YDR310C              | YJL043W     | 1               | 0               | x               | 1               |
| 63      | YBR049C              | YER187W.A   | 0               | 0               | x               | x               |
| 64      | YDR207C              | YIL072W     | 1               | 1               | 1               | 0               |
| 65      | YLR176C              | YPR015C     | 0               | 0               | x               | 0               |
| 66      | YJL176C              | YMR011W     | x               | x               | 0               | x               |
| 67      | YDR310C              | YCL026C.A   | 0               | 0               | 0               | 0               |
| 68      | YJL176C              | YDR043C     | x               | x               | 0               | x               |
| 69      | YCR084C              | YAL064W.B   | x               | x               | x               | x               |
| 70      | YBR049C              | YLR113W     | 1               | 0               | 0               | 0               |
| 71      | YCR084C              | YIL172C     | x               | x               | x               | x               |
| 72      | YGL073W              | YIR031C     | 0               | 0               | 0               | 0               |
| 73      | YIR033W              | YMR169C     | x               | x               | x               | x               |
| 74      | YBR033W              | YIR034C     | 0               | 0               | x               | x               |
| 75      | YDR310C              | YOL132W     | 1               | 1               | 0               | 0               |
| 76      | YCR084C              | YAL065C     | x               | x               | x               | x               |
| 77      | YDR207C              | YNL012W     | 1               | 1               | 0               | 0               |
| 78      | YHL020C              | YER026C     | 0               | 0               | x               | 0               |
| 79      | YPL075W              | YIL082W     | 0               | 0               | 0               | x               |
| 80      | YDR310C              | YOL091W     | 1               | 1               | 0               | 0               |
| 81      | YMR043W              | YER037W     | 0               | 0               | x               | 0               |
| 82      | YIL084C              | YLR303W     | x               | x               | x               | x               |
| 83      | YDR310C              | YBR180W     | 1               | 1               | 1               | 1               |
| 84      | YCR084C              | YKL224C     | x               | x               | x               | x               |
| 85      | YCR084C              | YJL223C     | x               | x               | x               | x               |
| 86      | YBR033W              | YIL094C     | 0               | 0               | x               | x               |
| 87      | YCR084C              | YOL157C     | x               | x               | x               | x               |
| 88      | YCR084C              | YJR158W     | x               | x               | x               | x               |
| 89      | YMR043W              | YKR075C     | 0               | 0               | 0               | 0               |
| 90      | YBR049C              | YNL143C     | 0               | 0               | x               | x               |
| 91      | YHL020C              | YDR502C     | 0               | 0               | x               | 0               |
| 92      | YOL148C              | YOR113W     | x               | x               | x               | x               |
| 93      | YJL176C              | YGR161C     | x               | x               | 0               | x               |
| 94      | YDR310C              | YBL098W     | 0               | 0               | 0               | 0               |
| 95      | YJL103C              | YGR222W     | x               | x               | x               | x               |
| 96      | YDR310C              | YLR307W     | 0               | 0               | x               | 0               |
| 97      | YMR043W              | YBL069W     | 0               | 0               | x               | 0               |
| 98      | YGL073W              | YKL163W     | 0               | 0               | 0               | 0               |
| 99      | YCR084C              | YIR041W     | x               | x               | x               | x               |
| 100     | YNL216W              | YBR033W     | 0               | 0               | 0               | 0               |
| 101     | YML099C              | YOL140W     | 1               | 1               | 1               | 1               |
| 102     | YIR033W              | YML130C     | x               | x               | x               | x               |
| 103     | YJL176C              | YKL096W     | x               | x               | 0               | x               |
| 104     | YDR207C              | YIL031W     | 1               | 1               | 0               | 0               |
| 105     | YDR207C              | YCR010C     | 1               | 0               | x               | 0               |
| 106     | YDL042C              | YNL337W     | x               | x               | x               | x               |
| 107     | YDR520C              | YBL042C     | 0               | 0               | x               | 0               |
| 108     | YJL127C              | YNL332W     | x               | x               | x               | x               |
| 109     | YDR191W              | YIR038C     | x               | x               | x               | x               |
| 110     | YDR310C              | YPL033C     | 1               | 0               | x               | 0               |
| 111     | YNL236W              | YMR031W.A   | x               | x               | x               | x               |
| 112     | YMR043W              | YER130C     | 0               | 0               | 0               | 0               |
| 113     | YHL020C              | YDR497C     | 1               | 1               | x               | 0               |
| 114     | YDR310C              | YOR365C     | 1               | 1               | 1               | 1               |
| 115     | YNL167C              | YBL071C     | 0               | 0               | 0               | x               |
| 116     | YML099C              | YJL088W     | 1               | 0               | 1               | 1               |
| 117     | YJL176C              | YBR230C     | x               | x               | 0               | x               |
| 118     | YBR297W              | YGR269W     | x               | x               | x               | x               |
| 119     | YDR207C              | YLL047W     | 0               | 0               | x               | x               |
| 120     | YCR084C              | YBR301W     | x               | x               | x               | x               |

| Ranking | Transcription factor | Target gene | SS <sub>1</sub> | SS <sub>2</sub> | SS <sub>3</sub> | SS <sub>4</sub> |
|---------|----------------------|-------------|-----------------|-----------------|-----------------|-----------------|
| 121     | YDR310C              | YOR339C     | 1               | 1               | x               | 0               |
| 122     | YML099C              | YOL058W     | 1               | 0               | 1               | 1               |
| 123     | YDR310C              | YBR045C     | 1               | 1               | x               | 0               |
| 124     | YDR207C              | YPL018W     | 1               | 0               | 0               | 0               |
| 125     | YIL130W              | YPR109W     | x               | x               | x               | x               |
| 126     | YDR310C              | YGR259C     | 0               | 0               | 0               | x               |
| 127     | YDR310C              | YGR260W     | 1               | 1               | 1               | 1               |
| 128     | YPL075W              | YHR046C     | 0               | 0               | 0               | 0               |
| 129     | YCR084C              | YFL053W     | x               | x               | x               | x               |
| 130     | YIL036W              | YBR116C     | 0               | 0               | x               | x               |
| 131     | YDR310C              | YOL047C     | 1               | 1               | x               | 0               |
| 132     | YMR042W              | YOL058W     | 0               | 0               | 1               | 0               |
| 133     | YMR042W              | YOL140W     | 1               | 1               | 1               | 1               |
| 134     | YCR084C              | YHR211W     | x               | x               | x               | x               |
| 135     | YCR084C              | YBR300C     | x               | x               | x               | x               |
| 136     | YDR207C              | YGL033W     | 1               | 0               | 0               | 0               |
| 137     | YOL004W              | YEL020C     | x               | x               | 0               | x               |
| 138     | YHL027W              | YBR182C     | 0               | 0               | 0               | 0               |
| 139     | YCR084C              | YIL099W     | x               | x               | x               | x               |
| 140     | YDR207C              | YMR306C.A   | 0               | 0               | 0               | x               |
| 141     | YJL089W              | YKR071C     | 0               | 0               | 0               | 0               |
| 142     | YIR033W              | YMR170C     | x               | x               | x               | x               |
| 143     | YIL131C              | YAL034W.A   | 1               | 1               | x               | 0               |
| 144     | YDR207C              | YMR101C     | 1               | 1               | x               | 1               |
| 145     | YJL127C              | YMR096W     | x               | x               | x               | x               |
| 146     | YLR176C              | YPL189W     | 0               | 0               | x               | 0               |
| 147     | YLR403W              | YPL095C     | 0               | 0               | 0               | 0               |
| 148     | YJL127C              | YJR156C     | x               | x               | x               | x               |
| 149     | YDR310C              | YOR214C     | 0               | 0               | x               | 0               |
| 150     | YNL216W              | YOR292C     | 0               | 0               | 1               | 0               |
| 151     | YMR043W              | YBR054W     | 1               | 0               | 0               | 0               |
| 152     | YDR310C              | YKR015C     | 1               | 1               | x               | 0               |
| 153     | YKL112W              | YDL039C     | 0               | 0               | 0               | 0               |
| 154     | YMR043W              | YJL016W     | 0               | 0               | x               | 0               |
| 155     | YGL073W              | YNL160W     | 0               | 0               | x               | 0               |
| 156     | YMR043W              | YER053C     | 0               | 0               | x               | 0               |
| 157     | YIR033W              | YMR040W     | x               | x               | x               | x               |
| 158     | YMR043W              | YKR058W     | 0               | 0               | x               | 0               |
| 159     | YIR033W              | YOL031C     | x               | x               | x               | x               |
| 160     | YOL004W              | YER119C     | x               | x               | x               | x               |
| 161     | YIR033W              | YOR289W     | x               | x               | x               | x               |
| 162     | YMR043W              | YPL188W     | 0               | 0               | 0               | 0               |
| 163     | YDR463W              | YFR030W     | 0               | 0               | 0               | 0               |
| 164     | YBL103C              | YLR089C     | 1               | 0               | 0               | 0               |
| 165     | YHL020C              | YJR073C     | 0               | 0               | x               | 0               |
| 166     | YDR310C              | YPR054W     | 1               | 1               | 1               | 0               |
| 167     | YLR403W              | YBR157C     | 0               | 0               | 0               | 0               |
| 168     | YCR084C              | YLL055W     | x               | x               | x               | x               |
| 169     | YNL167C              | YOL150C     | 0               | 0               | x               | x               |
| 170     | YOL108C              | YNL105W     | 0               | 0               | x               | x               |
| 171     | YDR310C              | YJL038C     | 1               | 0               | 1               | 0               |
| 172     | YOR290C              | YOR179C     | x               | x               | x               | x               |
| 173     | YPL075W              | YNR056C     | 0               | 0               | x               | 0               |
| 174     | YJL168C              | YNR057C     | x               | x               | x               | x               |
| 175     | YPL254W              | YMR031W.A   | x               | x               | x               | x               |
| 176     | YCR084C              | YOR009W     | x               | x               | x               | x               |
| 177     | YHL020C              | YNL170W     | 0               | 0               | x               | x               |
| 178     | YKL043W              | YPL120W     | 0               | 0               | x               | 0               |
| 179     | YIR033W              | YMR105C     | x               | x               | x               | x               |
| 180     | YHL020C              | YLR133W     | 0               | 0               | x               | 0               |

| Ranking | Transcription factor | Target gene | SS <sub>1</sub> | SS <sub>2</sub> | SS <sub>3</sub> | SS <sub>4</sub> |
|---------|----------------------|-------------|-----------------|-----------------|-----------------|-----------------|
| 181     | YJL176C              | YCR020C     | x               | x               | x               | x               |
| 182     | YLR403W              | YHL028W     | 0               | 0               | 0               | 0               |
| 183     | YGL073W              | YHL043W     | 0               | 0               | x               | 0               |
| 184     | YIR033W              | YHR087W     | x               | x               | x               | x               |
| 185     | YJL176C              | YDR137W     | x               | x               | x               | x               |
| 186     | YIR033W              | YDL124W     | x               | x               | x               | x               |
| 187     | YDR207C              | YHR202W     | 1               | 1               | 0               | 0               |
| 188     | YMR043W              | YJR096W     | 0               | 0               | x               | 0               |
| 189     | YDR310C              | YJR025C     | 1               | 1               | 1               | 1               |
| 190     | YDR207C              | YLL030C     | 1               | 1               | x               | x               |
| 191     | YPL075W              | YGR109W.A   | 0               | 0               | 0               | 0               |
| 192     | YPL075W              | YLR432W     | 0               | 0               | x               | 0               |
| 193     | YCR084C              | YDR402C     | x               | x               | x               | x               |
| 194     | YNL236W              | YOR218C     | x               | x               | x               | x               |
| 195     | YPL075W              | YHR216W     | 0               | 0               | x               | 0               |
| 196     | YHL020C              | YLR132C     | 0               | 0               | x               | 0               |
| 197     | YLR228C              | YLR165C     | x               | x               | x               | x               |
| 198     | YDR310C              | YNL204C     | 1               | 1               | 0               | 0               |
| 199     | YJL176C              | YCL040W     | x               | x               | 0               | x               |
| 200     | YCR084C              | YGL158W     | x               | x               | x               | x               |
| 201     | YNL314W              | YHR066W     | 0               | 0               | x               | 0               |
| 202     | YKL112W              | YLR162W     | 0               | 0               | x               | 0               |
| 203     | YDR207C              | YHR014W     | 1               | 1               | 1               | 0               |
| 204     | YMR016C              | YKL043W     | 1               | 0               | 0               | 1               |
| 205     | YIL036W              | YDR453C     | 0               | 0               | x               | 0               |
| 206     | YBR289W              | YDR416W     | x               | x               | x               | x               |
| 207     | YGL073W              | YGR121C     | 0               | 0               | x               | 0               |
| 208     | YDR310C              | YBR148W     | 1               | 1               | 1               | 1               |
| 209     | YNL216W              | YHR156C     | 0               | 0               | 0               | 0               |
| 210     | YMR043W              | YDR222W     | 0               | 0               | x               | 0               |
| 211     | YHL027W              | YLL052C     | 0               | 0               | 0               | 0               |
| 212     | YOL148C              | YHR110W     | x               | x               | x               | x               |
| 213     | YLR039C              | YGL229C     | x               | x               | x               | x               |
| 214     | YKL032C              | YGL250W     | 0               | 0               | x               | 0               |
| 215     | YLR403W              | YOR338W     | 0               | 0               | 0               | 0               |
| 216     | YCR081W              | YIL009W     | x               | x               | x               | x               |
| 217     | YOR162C              | YNL195C     | 0               | 0               | x               | 0               |
| 218     | YDR310C              | YER085C     | 1               | 1               | 0               | 0               |
| 219     | YDR310C              | YOR364W     | 0               | 0               | x               | x               |
| 220     | YNL314W              | YOL138C     | 0               | 0               | 0               | 0               |
| 221     | YPL075W              | YIL083C     | 0               | 0               | 0               | 0               |
| 222     | YDR310C              | YMR244W     | 0               | 0               | 0               | 0               |
| 223     | YOL004W              | YEL012W     | x               | x               | 0               | x               |
| 224     | YCR084C              | YGR293C     | x               | x               | x               | x               |
| 225     | YPL075W              | YAR075W     | 0               | 0               | x               | 0               |
| 226     | YMR043W              | YER150W     | 1               | 0               | x               | 0               |
| 227     | YNL167C              | YOL151W     | 1               | 1               | 0               | 0               |
| 228     | YOL051W              | YPL181W     | x               | x               | x               | x               |
| 229     | YJL127C              | YNR064C     | x               | x               | x               | x               |
| 230     | YDL020C              | YJL163C     | 0               | 0               | x               | 0               |
| 231     | YHL020C              | YGL077C     | 0               | 0               | x               | 0               |
| 232     | YIL036W              | YDR034W.B   | 0               | 0               | x               | 0               |
| 233     | YDR310C              | YOR190W     | 1               | 1               | x               | 0               |
| 234     | YIL036W              | YAL061W     | 0               | 0               | x               | 0               |
| 235     | YLR039C              | YOR040W     | x               | x               | x               | x               |
| 236     | YMR273C              | YGL100W     | x               | x               | x               | x               |
| 237     | YNL236W              | YHL043W     | x               | x               | x               | x               |
| 238     | YGR288W              | YLR312W.A   | x               | x               | x               | x               |
| 239     | YPR065W              | YJR047C     | 1               | 1               | 1               | 0               |
| 240     | YJL176C              | YCR047C     | x               | x               | 0               | x               |

| Ranking | Transcription factor | Target gene | SS <sub>1</sub> | SS <sub>2</sub> | SS <sub>3</sub> | SS <sub>4</sub> |
|---------|----------------------|-------------|-----------------|-----------------|-----------------|-----------------|
| 241     | YML099C              | YER069W     | 1               | 1               | 1               | 1               |
| 242     | YLR442C              | YDR449C     | x               | x               | x               | x               |
| 243     | YMR042W              | YER069W     | 1               | 1               | 1               | 1               |
| 244     | YDR310C              | YKR034W     | 0               | 0               | 0               | 0               |
| 245     | YIR033W              | YOL084W     | x               | x               | x               | x               |
| 246     | YJL176C              | YOR374W     | x               | x               | x               | x               |
| 247     | YOL068C              | YJR025C     | x               | x               | x               | x               |
| 248     | YDR310C              | YFR023W     | 1               | 1               | 1               | 1               |
| 249     | YJL176C              | YCR004C     | x               | x               | x               | x               |
| 250     | YJL176C              | YER062C     | x               | x               | 0               | x               |
| 251     | YDR207C              | YPR007C     | 1               | 1               | x               | 0               |
| 252     | YMR053C              | YDR189W     | 0               | 0               | x               | 0               |
| 253     | YLR014C              | YKL170W     | 0               | 0               | x               | x               |
| 254     | YDR207C              | YBR302C     | 0               | 0               | x               | 0               |
| 255     | YOL004W              | YER044C     | x               | x               | 0               | x               |
| 256     | YPL129W              | YJR103W     | x               | x               | x               | x               |
| 257     | YOL148C              | YJR162C     | x               | x               | x               | x               |
| 258     | YER040W              | YDR496C     | 0               | 0               | x               | 0               |
| 259     | YOR191W              | YKL100C     | x               | x               | x               | x               |
| 260     | YOL089C              | YLL028W     | 0               | 0               | 0               | x               |
| 261     | YPL075W              | YFL029C     | 0               | 0               | x               | 0               |
| 262     | YIR033W              | YHR104W     | x               | x               | x               | x               |
| 263     | YMR043W              | YER067W     | 0               | 0               | x               | 0               |
| 264     | YCR084C              | YCL069W     | x               | x               | x               | x               |
| 265     | YDR207C              | YNR057C     | 0               | 0               | 0               | 0               |
| 266     | YDR207C              | YHL048W     | 0               | 0               | 0               | 0               |
| 267     | YLR403W              | YPL159C     | 0               | 0               | 0               | 0               |
| 268     | YOL068C              | YGL230C     | x               | x               | x               | x               |
| 269     | YJL127C              | YNL335W     | x               | x               | x               | x               |
| 270     | YHR006W              | YER008C     | 0               | 0               | x               | x               |
| 271     | YCR084C              | YML131W     | x               | x               | x               | x               |
| 272     | YPR022C              | YBR281C     | x               | x               | x               | x               |
| 273     | YOR140W              | YBR260C     | x               | x               | x               | x               |
| 274     | YCR084C              | YJR159W     | x               | x               | x               | x               |
| 275     | YMR280C              | YER066W     | x               | x               | 0               | x               |
| 276     | YMR037C              | YLR323C     | 0               | 0               | x               | 0               |
| 277     | YKR036C              | YMR158W     | x               | x               | x               | x               |
| 278     | YOR290C              | YLR092W     | x               | x               | x               | x               |
| 279     | YDR207C              | YHL024W     | 1               | 0               | 0               | 0               |
| 280     | YOR290C              | YOR119C     | x               | x               | x               | x               |
| 281     | YDR310C              | YGL015C     | 1               | 1               | 0               | 0               |
| 282     | YCR084C              | YAR062W     | x               | x               | x               | x               |
| 283     | YLR418C              | YAL062W     | x               | x               | x               | x               |
| 284     | YLR418C              | YJL171C     | x               | x               | x               | x               |
| 285     | YBR289W              | YIR017C     | x               | x               | x               | x               |
| 286     | YMR042W              | YJL088W     | 1               | 0               | 1               | 1               |
| 287     | YJL168C              | YLR087C     | x               | x               | x               | x               |
| 288     | YPL075W              | YDL066W     | 0               | 0               | 0               | 0               |
| 289     | YOL068C              | YLR307W     | x               | x               | x               | x               |
| 290     | YGL181W              | YNL021W     | 0               | 0               | x               | 0               |
| 291     | YNL216W              | YOR394W     | 0               | 0               | 0               | 0               |
| 292     | YNL314W              | YMR039C     | 0               | 0               | 0               | 0               |
| 293     | YMR273C              | YEL030W     | x               | x               | x               | x               |
| 294     | YLR182W              | YIL120W     | 0               | 0               | x               | 0               |
| 295     | YGL073W              | YBR067C     | 0               | 0               | 0               | 0               |
| 296     | YDR310C              | YER106W     | 1               | 1               | x               | 0               |
| 297     | YHL020C              | YNL256W     | 0               | 0               | x               | 0               |
| 298     | YJL127C              | YLR217W     | x               | x               | x               | x               |
| 299     | YGL073W              | YJL079C     | 0               | 0               | 0               | 0               |
| 300     | YBL008W              | YPR109W     | 0               | 0               | x               | x               |
