# Supplementary material for: Reconstruction of large-scale regulatory networks based on perturbation graphs and transitive reduction: improved methods and their evaluation
Source: Springer Nature journal article supplement (doi:10.1186/1752-0509-7-73), 2013-08-08

Network 1 K = 1.5 Noise configuration: 1-LL [0.025, 0.025]

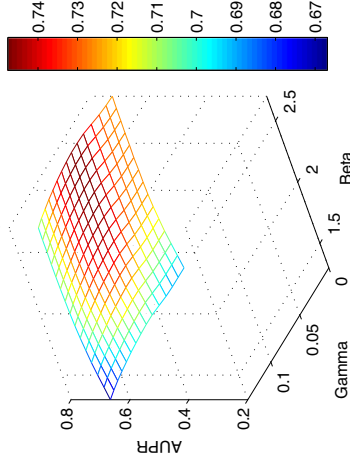

Network 1 K = 1.5 Noise configuration: 2-LM [0.025, 0.050]

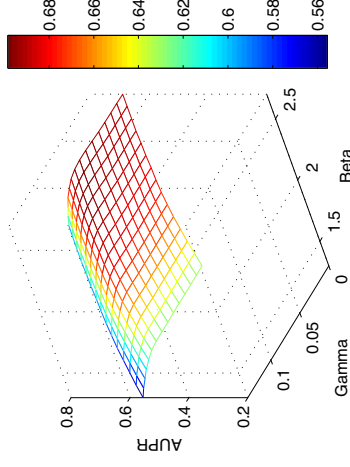

Network 1 K = 1.5 Noise configuration: 3-LH [0.025, 0.100]

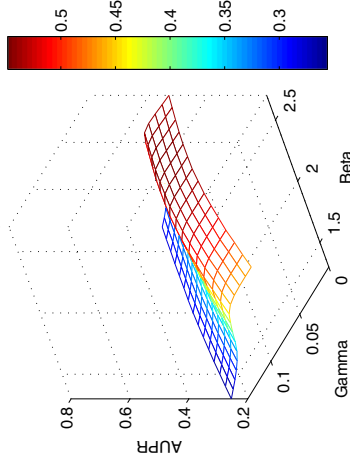

Network 1 K = 1.5 Noise configuration: 4-ML [0.050, 0.025]

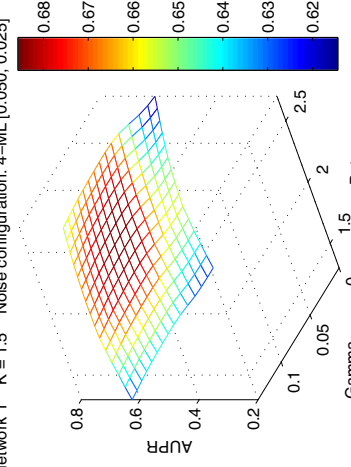

Network 1 K = 1.5 Noise configuration: 5-MM [0.050, 0.050]

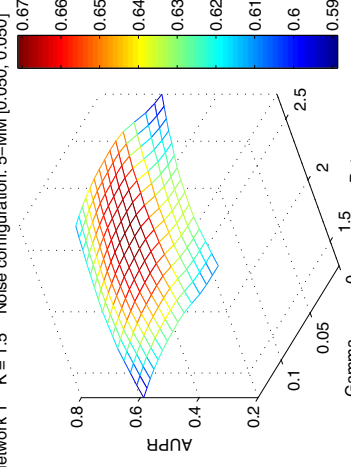

Network 1 K = 1.5 Noise configuration: 6-MH [0.050, 0.100]

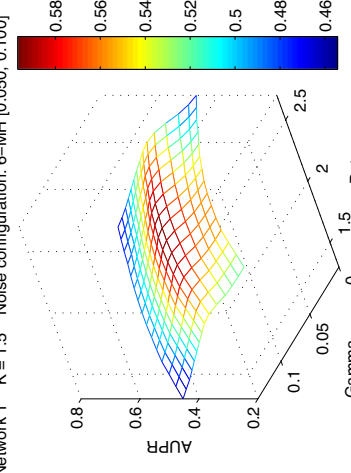

Network 1 K = 1.5 Noise configuration: 7-HL [0.100, 0.025]

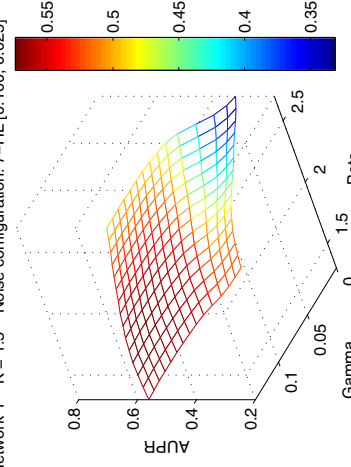

Network 1 K = 1.5 Noise configuration: 8-HM [0.100, 0.050]

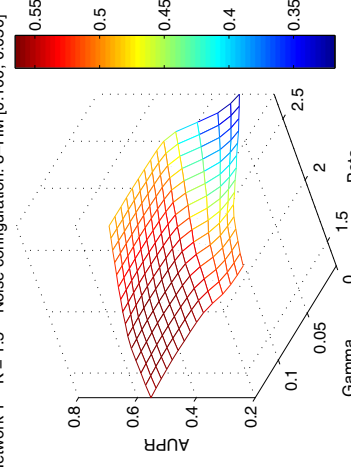

Network 1 K = 1.5 Noise configuration: 9-HH [0.100, 0.100]

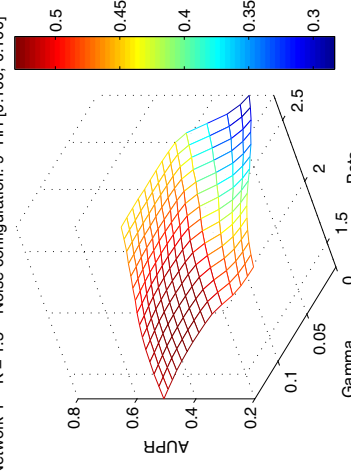

Supplement: 12918_2013_1441_MOESM6_ESM.pdf [file 12918_2013_1441_MOESM6_ESM.pdf]
