# Supplementary material for: Reconstruction of large-scale regulatory networks based on perturbation graphs and transitive reduction: improved methods and their evaluation
Source: Springer Nature journal article supplement (doi:10.1186/1752-0509-7-73), 2013-08-08

Average performance and comparison of PG vs TRANSWESD vs LTR

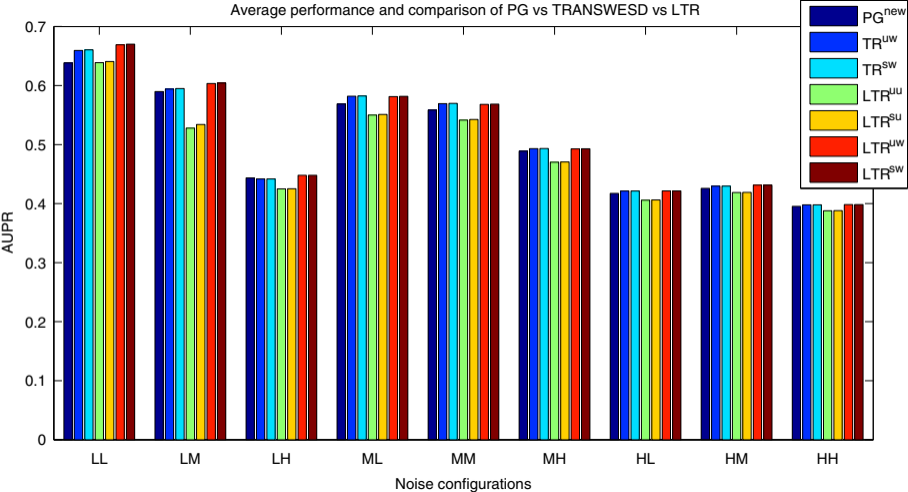

Supplement: 12918_2013_1441_MOESM7_ESM.pdf [file 12918_2013_1441_MOESM7_ESM.pdf]
