# Supplementary material for: Reconstruction of large-scale regulatory networks based on perturbation graphs and transitive reduction: improved methods and their evaluation
Source: Springer Nature journal article supplement (doi:10.1186/1752-0509-7-73), 2013-08-08

*(True) Interaction graph*

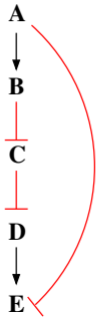

Single Perturbation  
Experiments

*Perturbation graph*

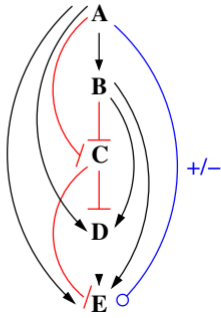

Supplement: 12918_2013_1441_MOESM9_ESM.pdf [file 12918_2013_1441_MOESM9_ESM.pdf]
